# Supplementary material for: Evaluations of Clinical Utilization of Metagenomic Next-Generation Sequencing in Adults With Fever of Unknown Origin
Source: PubMed Central journal article supplement (PMC8813867; doi:10.3389/fcimb.2021.745156), 2022-01-21

# SFig1 175 FUO case diagnosis path

FUO patients (175)

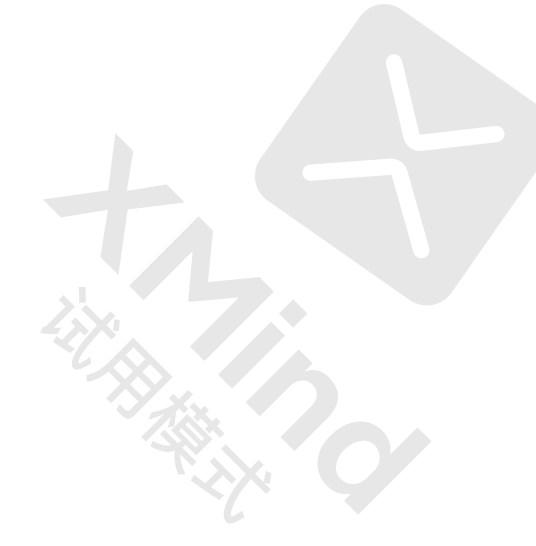

suspected bloodstream infection Collect blood samples, N=175

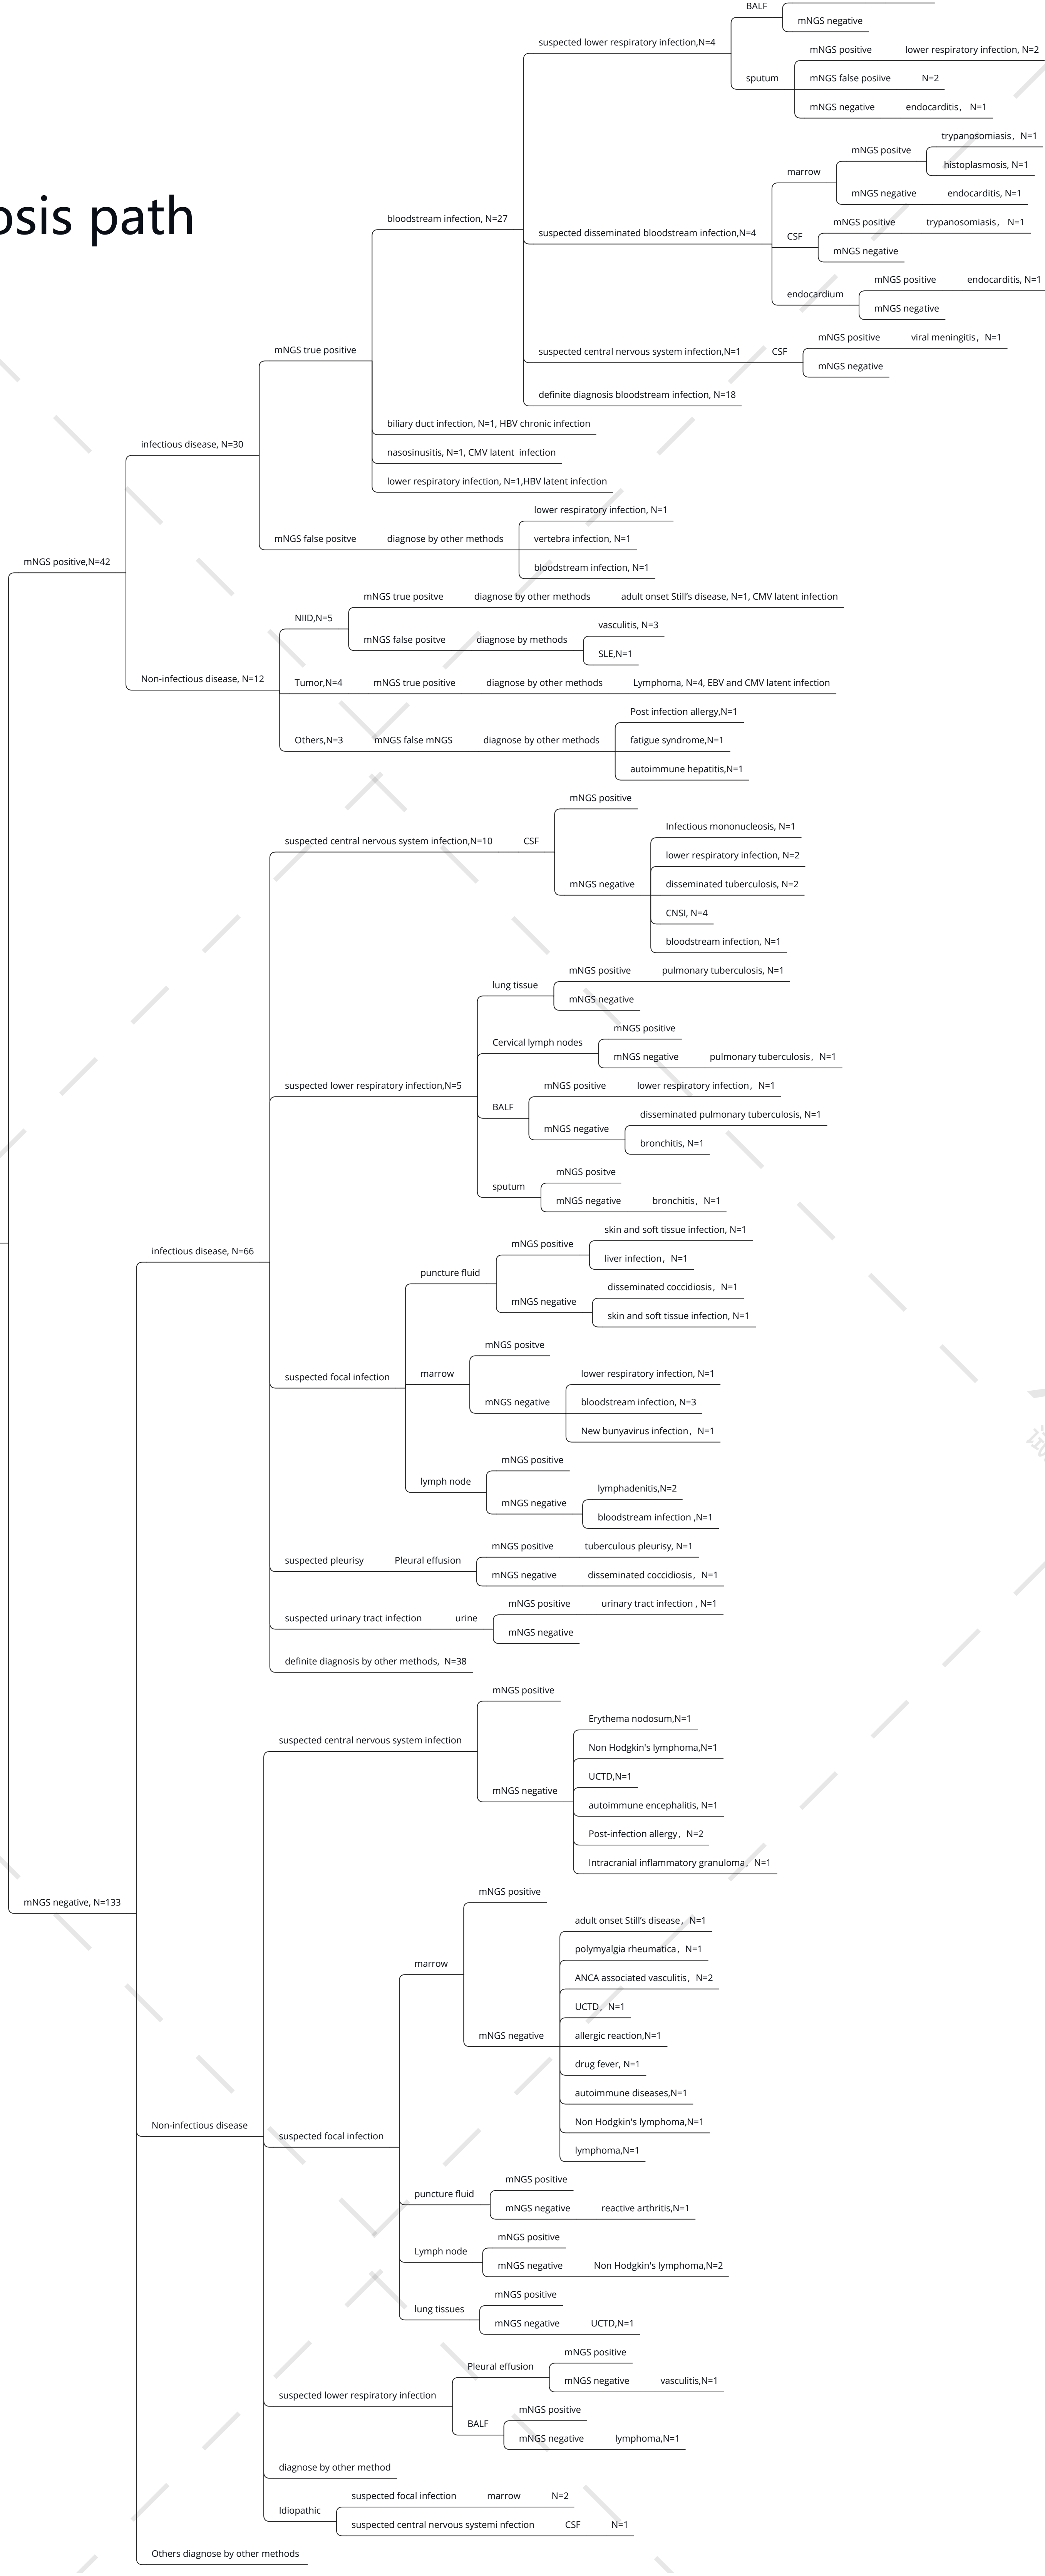

Supplement: DataSheet_1.pdf [file DataSheet_1.pdf]
